## ERRATUM

The article by Meier *et al.* entitled "Hyperoxic Ventilation Reduces 6-h Mortality at the Critical Hemoglobin Concentration" was published in the January issue of the Journal (ANESTHESIOLOGY 2004; 100:70–6) with errors in table 1, table 2, and figure 6. The unit for heart rate in table 1 and table 2 should have read 1/min, and the units for base excess and arterial lactate concentration in table 1, table 2, and figure 6 should have read mmol/l. The authors regret these errors.

## ERRATUM

The article by Xu *et al.* entitled "Halothane and Isoflurane Augment Depolarization-induced Cytosolic  $\text{Ca}^{2+}$  Transients and Attenuate Carbachol-stimulated  $\text{Ca}^{2+}$  Transients" was published in the June 2000 issue of the Journal (ANESTHESIOLOGY 2000; 92:1746–56) with an error in the labeling of figure 4. The corrected figure and legend appear below. The authors regret this error.

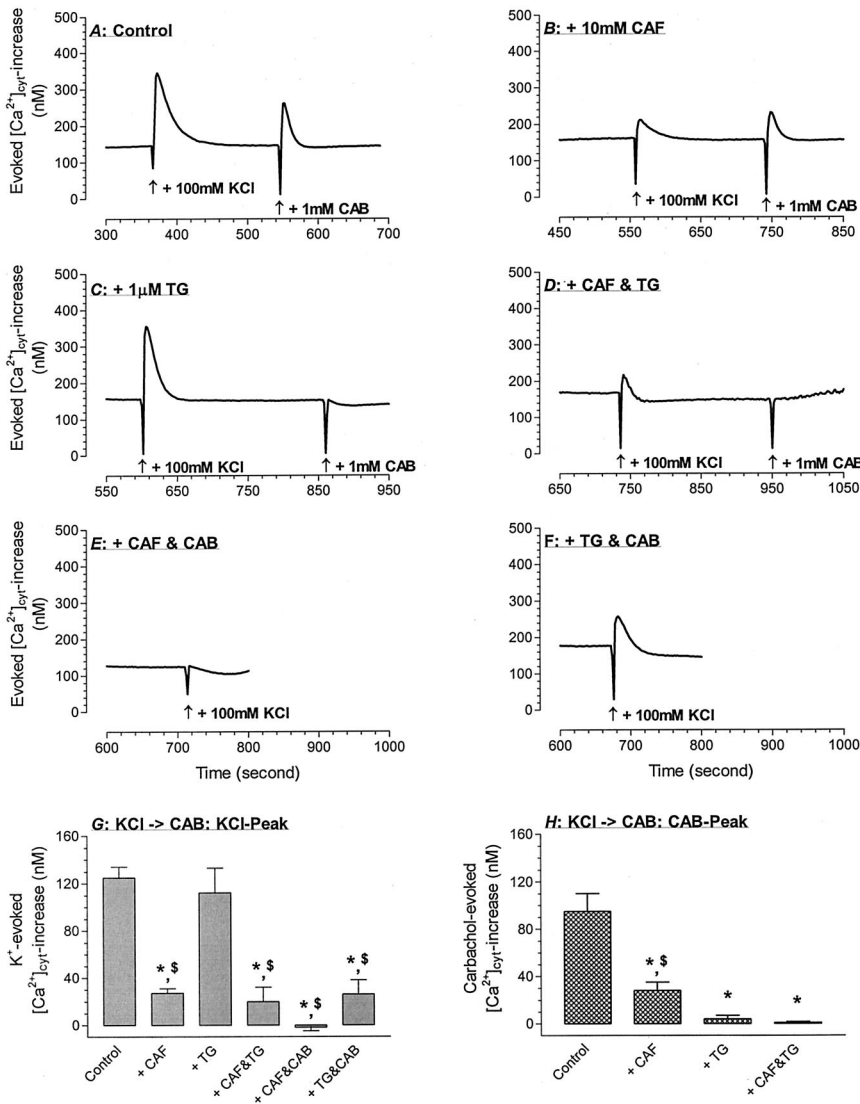

**Fig. 4. (A–E)** Representative traces of  $[\text{Ca}^{2+}]_{\text{cyt}}$ -changes with sequential stimulation using 100 mM KCl followed by 1 mM carbachol (CAB). (A) Control. (B–F) Cells were pretreated for 5 min with 10 mM caffeine (CAF). (B), 1  $\mu\text{M}$  thapsigargin (TG) (C), 10 mM CAF and 1  $\mu\text{M}$  TG (D), 10 mM CAF and 1  $\mu\text{M}$  CAB (E), or with 1  $\mu\text{M}$  TG and 1  $\mu\text{M}$  CAB (F). (G, H) Statistical summary. Values presented are mean  $\pm$  SEM ( $n = 2$ –19). The significance of the differences among different groups was tested using the Student-Neumann-Keuls test and labeled as follows: \* $P < 0.05$  to the control group; \$ $P < 0.05$  to the TG group.
